# Supplementary material for: Quaternary ammonium functionalized Fe3O4 & P(GMA-AA-DVB) magnetic Janus particles as highly efficient catalysts for phase transfer reactions
Source: Royal Society of Chemistry journal article supplement (doi:10.1039/c8dt02433b), 2018-01-01
Supplement: c8dt02433b1.pdf [file c8dt02433b1.pdf]

**Quaternary ammonium functionalized Fe<sub>3</sub>O<sub>4</sub> & P(GMA-AA-DVB)  
magnetic Janus particles as highly efficient catalysts for phase transfer  
reactions**

Xiangkun Jia, Yong Ma, Yin Liu, Baoliang Zhang, Hepeng Zhang, Qiuyu Zhang\*

MOE Key Laboratory of Material Physics and Chemistry under Extraordinary Conditions, School of Natural and Applied Science, Northwestern Polytechnical University, Xi'an 710072, P. R. China.

E-mail: qyzhang@nwpu.edu.cn

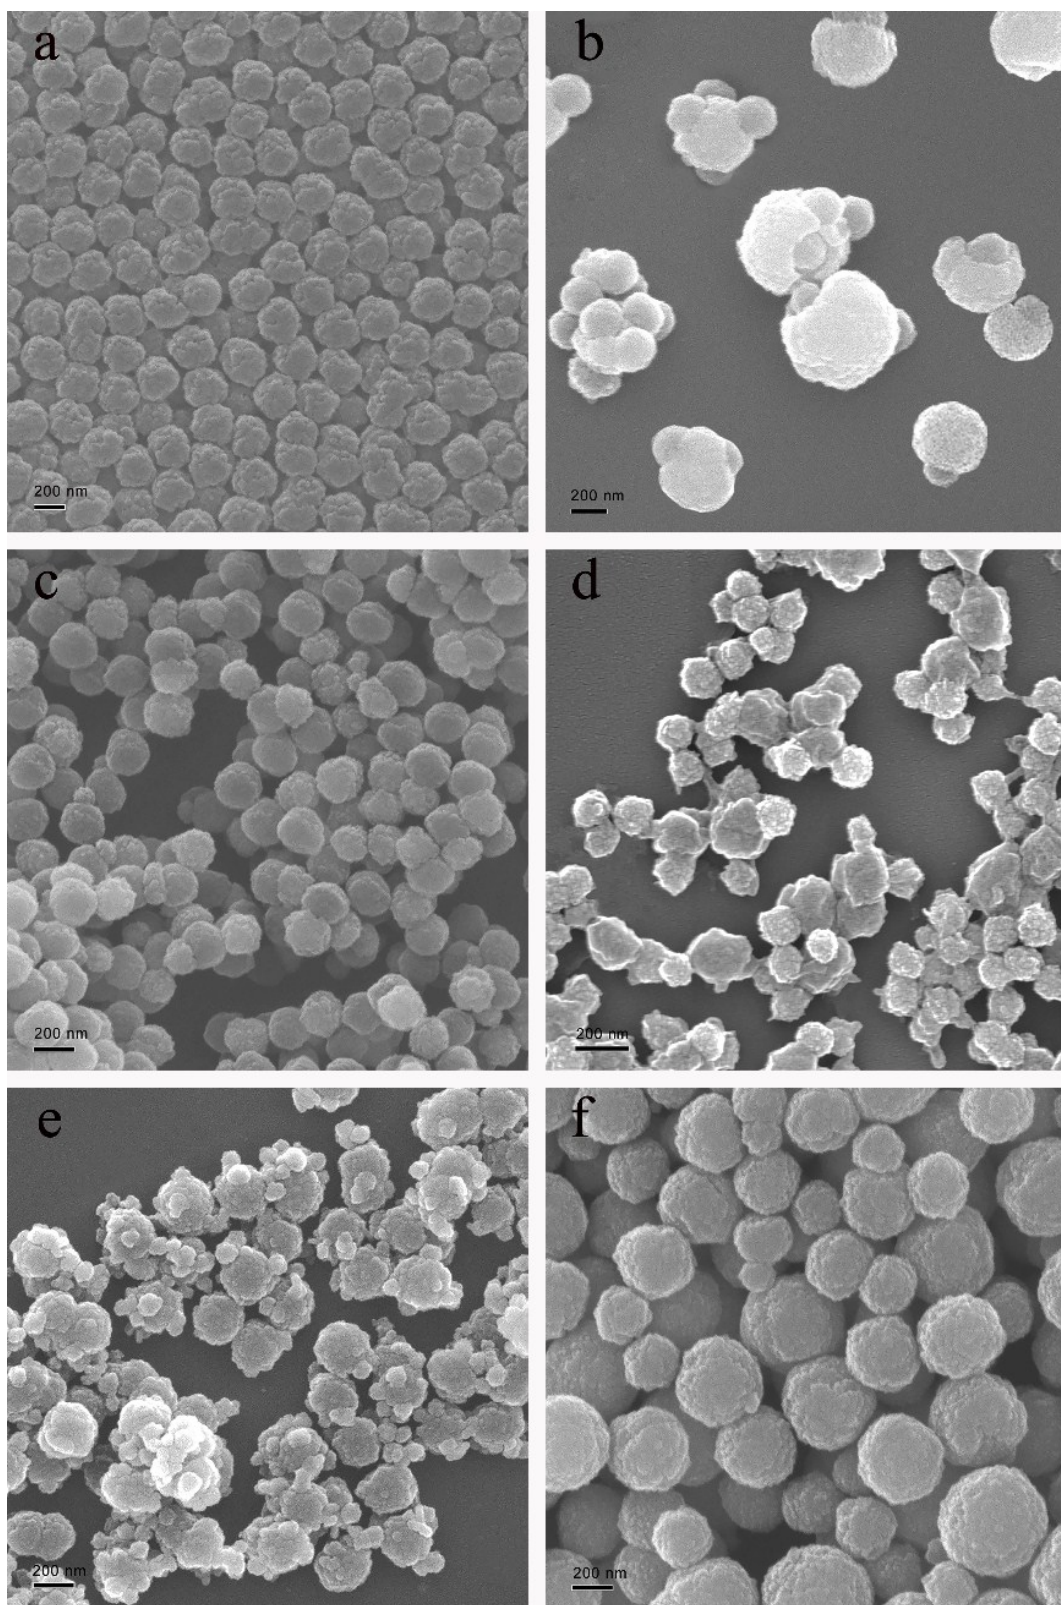

Fig. S1 SEM images of the  $\text{Fe}_3\text{O}_4$  & P(GMA-AA-DVB) Janus particles prepared with adding different dosages of P(GMA-AA-DVB):100 % (a); 45 % (b); 55 % (c); 65 % (d); 75 % (e) and 0 % (f).

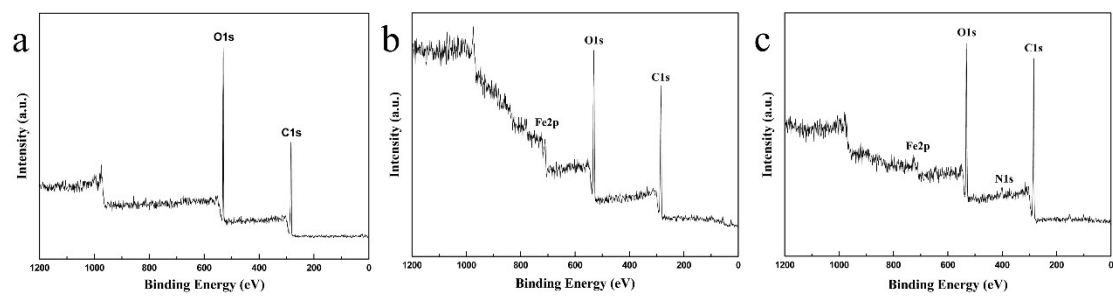

Fig. S2 The XPS spectra of P(GMA-AA-DVB) (a); Fe<sub>3</sub>O<sub>4</sub> & P(GMA-AA-DVB) (b) and MJPTCs (c)

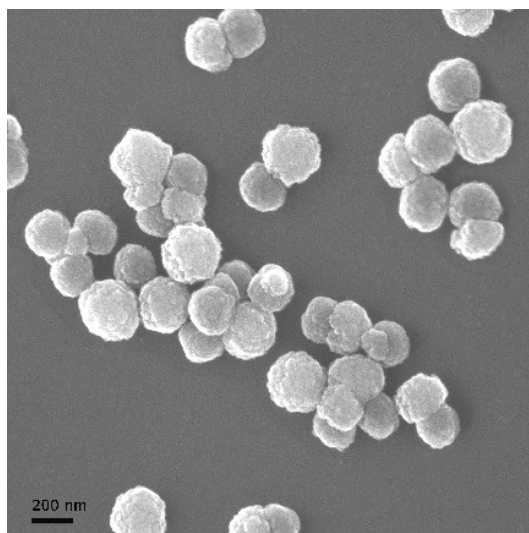

Fig. S3 SEM image of MJPTCs after 8 catalytic cycles.
